# Supplementary material for: Differences in protein structural regions that impact functional specificity in GT2 family β-glucan synthases
Source: PubMed Central journal article supplement (PMC6821405; doi:10.1371/journal.pone.0224442), 2019-10-30
Supplement: pone.0224442.s002.pdf [file pone.0224442.s002.pdf]

**S2 Table. Uniprot ID, class, family and genus for each sequence in clade 2 of the phylogenetic tree in Fig. 2. Uniprot ID's in bold have had their biochemical function confirmed.**

| Uniprot ID    | Class                      | Family                 | Genus                |
|---------------|----------------------------|------------------------|----------------------|
| A0A021X5E8    | Alphaproteobacteria        | Rhizobiales            | Shinella             |
| A0A059FN10    | Alphaproteobacteria        | Rhodobacterales        | Hyphomonas           |
| A0A059ZRW9    | Acidithiobacillia          | Acidithiobacillales    | Acidithiobacillus    |
| A0A066PPZ0    | Alphaproteobacteria        | Rhodospirillales       | Acidiphilium         |
| A0A068T187    | Alphaproteobacteria        | Rhizobiales            | Neorhizobium         |
| A0A071I811    | Alphaproteobacteria        | Rhizobiales            | Agrobacterium        |
| A0A081MFB1    | Alphaproteobacteria        | Rhizobiales            | Pseudorhizobium      |
| A9CZ20        | Alphaproteobacteria        | Rhizobiales            | Hoeflea              |
| B1M838        | Alphaproteobacteria        | Rhizobiales            | Methylobacterium     |
| B1ZDE0        | Alphaproteobacteria        | Rhizobiales            | Methylobacterium     |
| B8IRA8        | Alphaproteobacteria        | Rhizobiales            | Methylobacterium     |
| C1DW58        | Aquificae                  | Aquificales            | Sulfurihydrogenibium |
| C5AXY6        | Alphaproteobacteria        | Rhizobiales            | Methylobacterium     |
| C6X7P6        | Betaproteobacteria         | Nitrosomonadales       | Methylovorus         |
| D0D9E5        | Alphaproteobacteria        | Rhodobacterales        | Citricella           |
| D7A7Y7        | Alphaproteobacteria        | Rhizobiales            | Starkeya             |
| E2CHM5        | Alphaproteobacteria        | Rhodobacterales        | Roseibium            |
| F5Z9A6        | Gammaproteobacteria        | Alteromonadales        | Alteromonas          |
| F8WSU8        | Betaproteobacteria         | Neisseriales           | Chitiniphilus        |
| G0JQE7        | Acidithiobacillia          | Acidithiobacillales    | Acidithiobacillus    |
| G7ZFF0        | Alphaproteobacteria        | Rhodospirillales       | Azospirillum         |
| H1G6B6        | Gammaproteobacteria        | Chromatiales           | Ectothiorhodospira   |
| H8Z204        | Gammaproteobacteria        | Chromatiales           | Thiorhodovibrio      |
| I3TJI5        | Alphaproteobacteria        | Rhodospirillales       | Tistrella            |
| I4YT33        | Alphaproteobacteria        | Rhizobiales            | Microvirga           |
| I6B1T4        | Verrucomicrobia            | Opitutales             | Opitutaceae          |
| K0D1I4        | Gammaproteobacteria        | Alteromonadales        | Alteromonas          |
| L0LUH0        | Alphaproteobacteria        | Rhizobiales            | Rhizobium            |
| L8JER0        | Gammaproteobacteria        | Vibrionales            | Photobacterium       |
| M1P8C7        | Deltaproteobacteria        | Desulfobacterales      | Desulfocapsa         |
| N6TYZ6        | Alphaproteobacteria        | Rhizobiales            | Rhizobium            |
| O67406        | Aquificae                  | Aquificales            | Aquifex              |
| Q0FZX8        | Alphaproteobacteria        | Rhizobiales            | Fulvimarina          |
| Q1Q2A6        | Planctomycetes             | Candidatus Brocadiales | Kuenenia             |
| Q1YMV1        | Alphaproteobacteria        | Rhizobiales            | Aurantimonas         |
| <b>Q3J125</b> | <b>Alphaproteobacteria</b> | <b>Rhodobacterales</b> | <b>Rhodobacter</b>   |
| Q6LKT1        | Gammaproteobacteria        | Vibrionales            | Photobacterium       |
| S9QL88        | Alphaproteobacteria        | Rhodobacterales        | Salipiger            |
| U4KBF2        | Gammaproteobacteria        | Vibrionales            | Vibrio               |
| U7FLK2        | Alphaproteobacteria        | Rhodobacterales        | Labrenzia            |
| W4HF89        | Alphaproteobacteria        | Rhodobacterales        | Roseivivax           |
| W6WH65        | Alphaproteobacteria        | Rhizobiales            | Rhizobium            |
| W8IKN7        | Alphaproteobacteria        | Rhizobiales            | Ensifer              |
| W9H5X1        | Alphaproteobacteria        | Rhodospirillales       | Skermanella          |
