# Supplementary material for: Differences in protein structural regions that impact functional specificity in GT2 family β-glucan synthases
Source: PubMed Central journal article supplement (PMC6821405; doi:10.1371/journal.pone.0224442), 2019-10-30
Supplement: pone.0224442.s003.pdf [file pone.0224442.s003.pdf]

**S3 Table. Uniprot ID, class, family and genus for each sequence in clade 3 of the phylogenetic tree in Fig. 2. Uniprot ID's in bold have had their biochemical function confirmed.**

| Uniprot ID    | Class                      | Family             | Genus                |
|---------------|----------------------------|--------------------|----------------------|
| A0A010RQ04    | Gammaproteobacteria        | Pseudomonadales    | Pseudomonas          |
| A0A075JYU5    | Gammaproteobacteria        | Xanthomonadales    | Dyella               |
| A0A083USB4    | Gammaproteobacteria        | Pseudomonadales    | Pseudomonas          |
| A0A085FOH1    | Alphaproteobacteria        | Rhizobiales        | Bosea                |
| A0A088X5K4    | Betaproteobacteria         | Burkholderiales    | Burkholderia         |
| A0A0D5E800    | Betaproteobacteria         | Burkholderiales    | Burkholderia         |
| A3P3X2        | Betaproteobacteria         | Burkholderiales    | Burkholderia         |
| A5EHQ0        | Alphaproteobacteria        | Rhizobiales        | Bradyrhizobium       |
| B1ZH53        | Alphaproteobacteria        | Rhizobiales        | Methylobacterium     |
| B3R8X3        | Betaproteobacteria         | Burkholderiales    | Cupriavidus          |
| H0HE70        | Alphaproteobacteria        | Rhizobiales        | Agrobacterium        |
| H0SMR5        | Alphaproteobacteria        | Rhizobiales        | Bradyrhizobium       |
| H1KHJ2        | Alphaproteobacteria        | Rhizobiales        | Methylobacterium     |
| H1S6T8        | Betaproteobacteria         | Burkholderiales    | Cupriavidus          |
| J2IAM7        | Alphaproteobacteria        | Rhizobiales        | Rhizobium            |
| J2KYQ9        | Betaproteobacteria         | Burkholderiales    | Variovorax           |
| L2EIQ5        | Betaproteobacteria         | Burkholderiales    | Cupriavidus          |
| M4ZAP6        | Alphaproteobacteria        | Rhizobiales        | Bradyrhizobium       |
| N6V659        | Alphaproteobacteria        | Rhizobiales        | Rhizobium            |
| Q0FXH3        | Alphaproteobacteria        | Rhizobiales        | Fulvimarina          |
| Q0K344        | Betaproteobacteria         | Burkholderiales    | Cupriavidus          |
| Q1LMK9        | Betaproteobacteria         | Burkholderiales    | Cupriavidus          |
| Q1QG10        | Alphaproteobacteria        | Rhizobiales        | Nitrobacter          |
| <b>Q9X2V0</b> | <b>Alphaproteobacteria</b> | <b>Rhizobiales</b> | <b>Agrobacterium</b> |
| S2F1L0        | Gammaproteobacteria        | Pseudomonadales    | Pseudomonas          |
| S3I4Z3        | Alphaproteobacteria        | Rhizobiales        | Rhizobium            |
| T1XH98        | Betaproteobacteria         | Burkholderiales    | Variovorax           |
| U3QQC7        | Betaproteobacteria         | Burkholderiales    | Ralstonia            |
