# Supplementary material for: Differences in protein structural regions that impact functional specificity in GT2 family β-glucan synthases
Source: PubMed Central journal article supplement (PMC6821405; doi:10.1371/journal.pone.0224442), 2019-10-30
Supplement: pone.0224442.s004.pdf [file pone.0224442.s004.pdf]

**S4 Table. Uniprot ID, class, family and genus for each sequence in clade 4 of the phylogenetic tree in Fig. 2.**

| Uniprot ID | Class               | Family           | Genus            |
|------------|---------------------|------------------|------------------|
| AOA059IPM7 | Alphaproteobacteria | Rhodobacterales  | Defluviimonas    |
| AOA073J8B1 | Alphaproteobacteria | Rhodobacterales  | Sulfitobacter    |
| AOA085TZV3 | Alphaproteobacteria | Rhodobacterales  | Thioclava        |
| AOA0A0EKA1 | Alphaproteobacteria | Rhodobacterales  | Pseudoceanicola  |
| AOA0A1Y7R2 | Alphaproteobacteria | Sphingomonadales | Sphingomonas     |
| A3VA50     | Alphaproteobacteria | Rhodobacterales  | Maritimibacter   |
| A9CLP5     | Alphaproteobacteria | Rhizobiales      | Agrobacterium    |
| A9EF71     | Alphaproteobacteria | Rhodobacterales  | Oceanibulbus     |
| B7RS49     | Alphaproteobacteria | Rhodobacterales  | Roseobacter      |
| G7D8F8     | Alphaproteobacteria | Rhizobiales      | Bradyrhizobium   |
| G8AWM8     | Alphaproteobacteria | Rhodospirillales | Azospirillum     |
| I1AQF7     | Alphaproteobacteria | Rhodobacterales  | Citricella       |
| I2QHW1     | Alphaproteobacteria | Rhizobiales      | Bradyrhizobium   |
| I4YXG5     | Alphaproteobacteria | Rhizobiales      | Microvirga       |
| N0B9D1     | Alphaproteobacteria | Rhizobiales      | Hyphomicrobium   |
| Q89SF2     | Alphaproteobacteria | Rhizobiales      | Bradyrhizobium   |
| S9REP2     | Alphaproteobacteria | Rhodobacterales  | Salipiger        |
| U2Z5R8     | Alphaproteobacteria | Rhodobacterales  | Loktanella       |
| U4QAU9     | Alphaproteobacteria | Rhizobiales      | Rhizobium        |
| U7GIP0     | Alphaproteobacteria | Rhodobacterales  | Labrenzia        |
| W4HJU1     | Alphaproteobacteria | Rhodobacterales  | Roseivivax       |
| X6L2D2     | Alphaproteobacteria | Rhodobacterales  | Rhodobacteraceae |
