# Supplementary material for: Differences in protein structural regions that impact functional specificity in GT2 family β-glucan synthases
Source: PubMed Central journal article supplement (PMC6821405; doi:10.1371/journal.pone.0224442), 2019-10-30
Supplement: pone.0224442.s005.pdf [file pone.0224442.s005.pdf]

**S5 Table. Uniprot ID, class, family and genus for each sequence in clade 5 of the phylogenetic tree in Fig. 2. Uniprot ID's in bold have had their biochemical function confirmed.**

| Uniprot ID    | Class                      | Family             | Genus                |
|---------------|----------------------------|--------------------|----------------------|
| A3V6V4        | Alphaproteobacteria        | Rhodobacterales    | Loktanella           |
| A6UFV9        | Alphaproteobacteria        | Rhizobiales        | Sinorhizobium        |
| B1ZCT8        | Alphaproteobacteria        | Rhizobiales        | Methylobacterium     |
| B5ZZW3        | Alphaproteobacteria        | Rhizobiales        | Rhizobium            |
| B7QYS5        | Alphaproteobacteria        | Rhodobacterales    | Ruegeria             |
| B9JNA3        | Alphaproteobacteria        | Rhizobiales        | Agrobacterium        |
| C5AWH8        | Alphaproteobacteria        | Rhizobiales        | Methylobacterium     |
| F6F1S5        | Alphaproteobacteria        | Sphingomonadales   | Sphingobium          |
| G9AFS3        | Alphaproteobacteria        | Rhizobiales        | Rhizobium            |
| K0VWL9        | Alphaproteobacteria        | Rhizobiales        | Rhizobium            |
| K2KQ00        | Alphaproteobacteria        | Rhodospirillales   | Thalassospira        |
| N6UXJ1        | Alphaproteobacteria        | Rhizobiales        | Rhizobium            |
| Q2K103        | Alphaproteobacteria        | Rhizobiales        | Rhizobium            |
| Q6W2C4        | Alphaproteobacteria        | Rhizobiales        | Sinorhizobium        |
| Q89FJ5        | Alphaproteobacteria        | Rhizobiales        | Bradyrhizobium       |
| <b>Q92WG2</b> | <b>Alphaproteobacteria</b> | <b>Rhizobiales</b> | <b>Sinorhizobium</b> |
| W6RQT0        | Alphaproteobacteria        | Rhizobiales        | Rhizobium            |
