# Supplementary material for: Differences in protein structural regions that impact functional specificity in GT2 family β-glucan synthases
Source: PubMed Central journal article supplement (PMC6821405; doi:10.1371/journal.pone.0224442), 2019-10-30
Supplement: pone.0224442.s006.pdf [file pone.0224442.s006.pdf]

**S6 Table. Uniprot ID, class, family and genus for each sequence in clade 6 of the phylogenetic tree in Fig. 2.**

| Uniprot ID | Class         | Family              | Genus               |
|------------|---------------|---------------------|---------------------|
| A0A098TK17 | Cyanobacteria | Synechococcales     | Neosynechococcus    |
| A8YGG6     | Cyanobacteria | Chroococcales       | Microcystis         |
| B0CG43     | Cyanobacteria | Synechococcales     | Acaryochloris       |
| B1WT24     | Cyanobacteria | Oscillatoriales     | Cyanothece          |
| E5RST1     | Cyanobacteria | Synechococcales     | Thermosynechococcus |
| F4XR19     | Cyanobacteria | Oscillatoriales     | Moorea              |
| I4I983     | Cyanobacteria | Chroococcales       | Microcystis         |
| K1XD05     | Cyanobacteria | Oscillatoriales     | Arthrospira         |
| K8GLD3     | Cyanobacteria | Oscillatoriales     | Oscillatoriales     |
| K9PC34     | Cyanobacteria | Nostocales          | Calothrix           |
| K9R5C6     | Cyanobacteria | Nostocales          | Rivularia           |
| K9SSF2     | Cyanobacteria | Synechococcales     | Synechococcus       |
| K9SZX2     | Cyanobacteria | Pleurocapsales      | Pleurocapsa         |
| K9TYQ6     | Cyanobacteria | Chroococciopsidales | Chroococciopsis     |
| K9VBT4     | Cyanobacteria | Oscillatoriales     | Oscillatoria        |
| K9WIY7     | Cyanobacteria | Oscillatoriales     | Microcoleus         |
| K9XWJ2     | Cyanobacteria | Pleurocapsales      | Stanieria           |
| K9YDM6     | Cyanobacteria | Chroococcales       | Halothece           |
| K9YJ51     | Cyanobacteria | Chroococcales       | Cyanobacterium      |
| K9YXK5     | Cyanobacteria | Synechococcales     | Dactylococcopsis    |
| K9Z043     | Cyanobacteria | Chroococcales       | Cyanobacterium      |
| L8LP39     | Cyanobacteria | Chroococcales       | Gloeocapsa          |
| Q31L88     | Cyanobacteria | Synechococcales     | Synechococcus       |
| Q8DHZ8     | Cyanobacteria | Synechococcales     | Thermosynechococcus |
| Q8GMT2     | Cyanobacteria | Synechococcales     | Synechococcus       |
| S3J0T5     | Cyanobacteria | Chroococcales       | Microcystis         |
| T2JT18     | Cyanobacteria | Chroococcales       | Crocospaera         |
| U5DPT8     | Cyanobacteria | Chroococcales       | Rubidibacter        |
| U7QFU0     | Cyanobacteria | Oscillatoriales     | Lyngbya             |
| U9VTW1     | Cyanobacteria | Synechococcales     | Leptolyngbya        |
| V5V6G1     | Cyanobacteria | Synechococcales     | Thermosynechococcus |
