# Supplementary material for: Differences in protein structural regions that impact functional specificity in GT2 family β-glucan synthases
Source: PubMed Central journal article supplement (PMC6821405; doi:10.1371/journal.pone.0224442), 2019-10-30
Supplement: pone.0224442.s008.pdf [file pone.0224442.s008.pdf]

**S8 Table. Residues conserved within a bacterial  $\beta$ -glucan synthase sub-family but different across sub-families.**

| Res | SS                         | Clade 1 (AcsA)         | Clade 2 (BcsA)       | Clade 3 (CrdS)       | Clade 5 (BgsA)       |
|-----|----------------------------|------------------------|----------------------|----------------------|----------------------|
| 183 | $\alpha$ 2                 | Arg                    | Thr/Ser              | Arg                  | Arg                  |
| 249 | $\beta$ 5                  | His                    | His                  | Phe                  | Phe                  |
| 276 | $\beta$ 6- $\alpha$ 6      | His                    | His                  | Mainly Gln/ some His | Gln                  |
| 285 | $\alpha$ 6                 | Glu                    | Glu                  | Gln                  | Gln                  |
| 295 | $\alpha$ 7/IF1             | Pro                    | Pro                  | Val                  | Pro                  |
| 296 |                            | Asn                    | Mainly Ser           | Asp                  | Asp                  |
| 298 |                            | Gly                    | Asn                  | Gln                  | Gln                  |
| 299 |                            | Thr                    | Mainly Glu/ some Asp | Arg                  | Arg                  |
| 302 |                            | Tyr                    | Tyr                  | Phe                  | Phe                  |
| 309 |                            | Asn                    | Leu                  | Lys                  | Arg                  |
| 317 |                            | Phe                    | Phe                  | Cys                  | Cys                  |
| 318 | $\alpha$ 7/IF1- $\beta$ 7  | Cys                    | Cys                  | Val/Ile              | Cys                  |
| 320 |                            | Ser                    | Ser                  | Thr                  | Ser                  |
| 321 |                            | Cys                    | Ala                  | Ser                  | Mainly Cys/ some Asn |
| 322 |                            | Ala                    | Ala                  | Mainly Phe/ some Cys | Ser                  |
| 336 |                            | $\alpha$ 8- $\alpha$ 9 | Ala                  | Ser/Some Ala         | Pro                  |
| 351 | $\alpha$ 9                 | His/some Gln           | His                  | Various              | Leu                  |
| 357 | B8                         | Ser/Thr                | Ser                  | Thr                  | Thr                  |
| 359 |                            | Tyr                    | Tyr                  | Trp                  | Tyr                  |
| 370 | $\beta$ 9- $\alpha$ 10/IF2 | Thr                    | Pro                  | Ala                  | Mainly Ala/ some Pro |
| 376 | $\alpha$ 10/IF2            | His                    | Mainly Phe           | Tyr                  | Mainly Tyr/ some Phe |
| 387 |                            | Met                    | Met                  | Thr                  | Mainly Gly/ some Ala |
| 395 | $\alpha$ 10/IF2-TM3        | -                      | -                    | Gly                  | Gly                  |
| 402 |                            | Leu                    | Leu                  | Mainly Tyr/ some Phe | Leu                  |
| 410 | TM3                        | Tyr                    | Tyr                  | Mainly Tyr/ some Phe | Phe                  |
| 412 |                            | Asn/some Ser           | Ser/ some Asn        | His                  | -                    |
| 417 |                            | Phe                    | Trp                  | Trp                  | Leu                  |
| 465 | TM4                        | Arg/Lys                | Various              | Trp                  | Trp                  |
| 479 | TM5/IF3                    | Tyr                    | Tyr                  | Mainly Thr/ some Ser | Mainly Val           |
| 480 |                            | Glu                    | Glu                  | Gln/His              | Mainly Gly           |
| 500 | Gating Loop                | Various                | Various              | Gly                  | Gly                  |
| 501 |                            | Pro                    | Pro                  | Arg                  | Mainly Lys           |
| 562 | TM7                        | Asn                    | Asn                  | Ala/Ser              | Asn                  |

Gaps in sequences indicated by “-”.

Residues are numbered relative to the RsBcsA crystal structure.
