# Supplementary material for: Differences in protein structural regions that impact functional specificity in GT2 family β-glucan synthases
Source: PubMed Central journal article supplement (PMC6821405; doi:10.1371/journal.pone.0224442), 2019-10-30
Supplement: pone.0224442.s009.pdf [file pone.0224442.s009.pdf]

**S9 Table. Assessment scores for AtumCrdS homology models.**

|            | Template | Residues | DOPE   |         | MolProbity |
|------------|----------|----------|--------|---------|------------|
|            |          |          | Score  | Z-score |            |
| Modeller-1 | 4p00     | 542      | -65262 | -0.102  | 3.45       |
| Modeller-2 | 4p00     | 542      | -66022 | -0.201  | 3.38       |
| Modeller-3 | 4p00     | 542      | -65901 | -0.185  | 3.38       |
| Swissmodel | 4p00     | 541      | -69518 | -0.697  | 1.92       |
| iTasser-1  | Multiple | 544      | -70692 | -0.752  | 2.93       |
| iTasser-2  | 4p00     | 542      | -70554 | -0.793  | 2.96       |
| Rosetta    | 4p00     | 542      | -70536 | -0.791  | 1.44       |

Scores for various AtumCrdS HM that were produced detailing the template structure used, number of residues in final structure, DOPE score, DOPE Z-score and MolProbity score. The lower the score the higher the predicted quality of the model.
