# Supplementary material for: Differences in protein structural regions that impact functional specificity in GT2 family β-glucan synthases
Source: PubMed Central journal article supplement (PMC6821405; doi:10.1371/journal.pone.0224442), 2019-10-30
Supplement: pone.0224442.s010.pdf [file pone.0224442.s010.pdf]

**S10 Table. Degrees of rotation (°) of Glc residues of  $\beta$ -glucans relative to conserved Trp of AtumCrdS and RsBcsA calculated over the last 50 ns.**

| Glc      | AtumCrdS<br>Conf-F |        | AtumCrdS<br>Conf-B |        | RsBcsA<br>Conf-F |        | RsBcsA<br>Conf-B |        |
|----------|--------------------|--------|--------------------|--------|------------------|--------|------------------|--------|
|          | Avg                | St Dev | Avg                | St Dev | Avg              | St Dev | Avg              | St Dev |
| 10       | 43.34              | 15.80  | -54.42             | 27.05  |                  |        |                  |        |
| 9        | 149.92             | 9.04   | 86.82              | 8.30   | -44.11           | 24.81  | 173.58           | 27.18  |
| 8        | 171.29             | 9.47   | -103.18            | 7.79   | -171.27          | 10.30  | -38.19           | 9.83   |
| 7        | 20.44              | 8.77   | -118.15            | 8.69   | -30.62           | 12.12  | 104.28           | 9.65   |
| 6        | -125.76            | 8.64   | -176.00            | 11.35  | 97.21            | 22.86  | -127.87          | 11.21  |
| 5        | 83.27              | 9.31   | 106.44             | 10.16  | -125.66          | 7.94   | 74.52            | 11.46  |
| 4        | 102.13             | 8.22   | 103.54             | 7.24   | 27.12            | 10.11  | -155.73          | 10.28  |
| 3        | 126.69             | 11.90  | 32.22              | 6.89   | -113.03          | 21.32  | 23.13            | 10.18  |
| 2        | -95.37             | 10.21  | -118.51            | 10.34  | 13.02            | 7.20   | -128.45          | 9.54   |
| 1        | 51.16              | 15.08  | 37.02              | 8.68   | -131.39          | 7.54   | 14.89            | 8.27   |
| Acceptor | 9.39               | 10.99  | 171.52             | 5.87   | 19.92            | 8.45   | 165.35           | 13.59  |
| Donor    | 3.67               | 15.36  | 34.88              | 11.45  |                  |        |                  |        |
