# Supplementary material for: Differences in protein structural regions that impact functional specificity in GT2 family β-glucan synthases
Source: PubMed Central journal article supplement (PMC6821405; doi:10.1371/journal.pone.0224442), 2019-10-30
Supplement: pone.0224442.s011.pdf [file pone.0224442.s011.pdf]

**S11 Table. Distance (Å) between the centre of mass of each Glc residue of the  $\beta$ -glucan chain and the C $\alpha$  atom of the conserved Trp calculated over the last 50 ns.**

| Glucose  | AtumCrdS<br>Conf-F |        | AtumCrdS<br>Conf-B |        | RsBcsA<br>Conf-F |        | RsBcsA<br>Conf-B |        |
|----------|--------------------|--------|--------------------|--------|------------------|--------|------------------|--------|
|          | Avg                | St Dev | Avg                | St Dev | Avg              | St Dev | Avg              | St Dev |
|          | 10                 | 42.03  | 0.40               | 38.41  | 0.46             |        |                  |        |
| 9        | 37.52              | 0.39   | 34.07              | 0.47   | 42.27            | 0.57   | 40.77            | 0.64   |
| 8        | 32.57              | 0.38   | 29.87              | 0.40   | 37.56            | 0.52   | 36.21            | 0.44   |
| 7        | 28.53              | 0.36   | 25.45              | 0.39   | 32.76            | 0.49   | 31.29            | 0.41   |
| 6        | 24.17              | 0.38   | 22.50              | 0.35   | 27.99            | 0.47   | 26.77            | 0.40   |
| 5        | 21.03              | 0.36   | 18.82              | 0.30   | 23.74            | 0.45   | 22.42            | 0.38   |
| 4        | 16.36              | 0.37   | 14.00              | 0.29   | 19.50            | 0.45   | 17.90            | 0.37   |
| 3        | 11.30              | 0.40   | 10.55              | 0.29   | 14.60            | 0.49   | 12.89            | 0.35   |
| 2        | 7.62               | 0.42   | 6.71               | 0.32   | 9.44             | 0.50   | 7.75             | 0.35   |
| 1        | 3.29               | 0.31   | 2.45               | 0.27   | 4.51             | 0.47   | 3.21             | 0.33   |
| Acceptor | -1.55              | 0.32   | -1.93              | 0.31   | -0.56            | 0.47   | -1.34            | 0.36   |
| Donor    | -6.15              | 0.33   | -5.79              | 0.24   |                  |        |                  |        |
