# Supplementary material for: Differences in protein structural regions that impact functional specificity in GT2 family β-glucan synthases
Source: PubMed Central journal article supplement (PMC6821405; doi:10.1371/journal.pone.0224442), 2019-10-30
Supplement: pone.0224442.s012.pdf [file pone.0224442.s012.pdf]

**S12 Table. Protein amino acid residue-Glc H-bond occupancy (%) with Glc residues numbered relative to the acceptor Glc that is Glc#0 (Glc 0) for AtumCrdS simulations calculated over the last 50 ns.**

| AtumCrdS Conf-F |          |           | AtumCrdS Conf-B |          |           |
|-----------------|----------|-----------|-----------------|----------|-----------|
| Donor           | Acceptor | Occupancy | Donor           | Acceptor | Occupancy |
| Glu80           | Glc7:O4  | 100.0     | Glu80           | Glc9:O4  | 90.9      |
| Glu80           | Glc7:O6  | 102.9     | Glu80           | Glc8:O2  | 69.6      |
| Asp258          | Glc2:O4  | 155.5     | Phe262          | Glc2:O2  | 26.4      |
| Leu403          | Glc9:O2  | 95.6      | His374          | Glc2:O2  | 35.9      |
| Asp406          | Glc10:O6 | 32.6      | Leu388          | Glc7:O6  | 33.7      |
| Glu439          | Glc5:O2  | 73.2      | Ala402          | Glc10:O4 | 87.0      |
| Glu439          | Glc4:O2  | 73.0      | Leu403          | Glc9:O6  | 42.3      |
| Asn518          | Glc9:O6  | 64.2      | Glu439          | Glc5:O2  | 37.1      |
| Asn518          | Glc8:O6  | 92.7      | Asn518          | Glc8:O6  | 74.3      |
| Glc10:O2        | Ser512   | 37.8      | Glc10:O3        | Asn518   | 97.6      |
| Glc9:O2         | Ala402   | 86.5      | Glc10:O4        | Asn518   | 25.5      |
| Glc9:O2         | Leu403   | 76.0      | Glc10:O4        | Tyr395   | 54.0      |
| Glc8:O5         | Asn518   | 94.8      | Glc9:O4         | Arg56    | 38.2      |
| Glc7:O6         | Arg56    | 54.2      | Glc9:O6         | Arg56    | 64.3      |
| Glc6:O6         | Trp521   | 80.0      | Glc6:O4         | Trp422   | 73.8      |
| Glc4:O2         | His442   | 79.7      | Glc4:O2         | His442   | 86.6      |
| Glc4:O3         | His442   | 29.6      | Glc4:O4         | Ser90    | 27.1      |
| Glc3:O2         | His442   | 65.6      | Glc3:O5         | Ser90    | 99.6      |
| Glc2:O6         | Lys382   | 99.7      | Glc4:O6         | Thr433   | 28.3      |
| Glc2:O4         | Arg341   | 61.6      | Glc4:O6         | Ser429   | 58.0      |
| Glc1:O6         | His374   | 55.0      | Glc3:O2         | His442   | 36.0      |
|                 |          |           | Glc3:O6         | His374   | 79.4      |
|                 |          |           | Glc0:O4         | Gln237   | 58.9      |

Note: occupancy can be >100% for residues able to form more than one H-bond.
