# Supplementary material for: Differences in protein structural regions that impact functional specificity in GT2 family β-glucan synthases
Source: PubMed Central journal article supplement (PMC6821405; doi:10.1371/journal.pone.0224442), 2019-10-30
Supplement: pone.0224442.s013.pdf [file pone.0224442.s013.pdf]

**S13 Table. Protein amino acid residue-Glc H-bond occupancy (%) with Glc residues numbered relative to the acceptor Glc that is Glc#0 (Glc0) for RsBcsA simulations, calculated over the last 50 ns.**

| RsBcsA Conf-F |          |           | RsBcsA Conf-B |          |           |
|---------------|----------|-----------|---------------|----------|-----------|
| Donor         | Acceptor | Occupancy | Donor         | Acceptor | Occupancy |
| Glu108        | Glc5:O2  | 95.6      | Glu108        | Glc6:O2  | 99.1      |
| Ser111        | Glc4:O6  | 36.6      | Glu108        | Glc6:O3  | 92.5      |
| Asn118        | Glc2:O6  | 71.4      | Ser111        | Glc4:O2  | 89.1      |
| Glu297        | Glc1:O6  | 62.9      | Asn118        | Glc2:O2  | 29.9      |
| Cys318        | Glc0:O3  | 25.8      | Glu297        | Glc2:O6  | 94.5      |
| Asp343        | Glc0:O6  | 74.7      | Asp343        | Glc0:O3  | 58.0      |
| Ser413        | Glc1:O2  | 77.7      | Ala429        | Glc7:O2  | 74.1      |
| Phe426        | Glc6:O2  | 47.5      | Glu439        | Glc9:O2  | 58.1      |
| Ala429        | Glc7:O6  | 68.1      | Phe441        | Glc9:O3  | 51.0      |
| Ala443        | Glc9:O3  | 38.4      | Phe441        | Glc8:O6  | 72.5      |
| Ala443        | Glc8:O6  | 29.8      | Gln463        | Glc3:O2  | 66.6      |
| Glu477        | Glc4:O2  | 100.0     | Glu477        | Glc4:O6  | 123.7     |
| Glu477        | Glc4:O3  | 63.2      | Glc8:O6       | Ile440   | 82.2      |
| Glu480        | Glc3:O6  | 99.9      | Glc8:O6       | Phe441   | 84.2      |
| Glc9:O3       | Ala443   | 59.0      | Glc7:O6       | Trp558   | 58.6      |
| Glc7:O3       | Trp558   | 57.4      | Glc5:O6       | Ser459   | 74.1      |
| Glc5:O2       | Tyr455   | 99.5      | Glc4:O6       | Gln463   | 55.1      |
| Glc5:O3       | Ser111   | 57.3      | Glc3:O2       | Arg471   | 87.3      |
| Glc5:O3       | Tyr455   | 34.2      | Glc3:O3       | Arg471   | 48.6      |
| Glc5:O6       | Arg423   | 93.0      | Glc3:O6       | Asn118   | 37.8      |
| Glc4:O5       | Ser459   | 46.6      | Glc2:O6       | Arg471   | 31.5      |
| Glc4:O2       | Arg423   | 156.8     | Glc0:O2       | Trp417   | 54.7      |
| Glc4:O3       | Gln463   | 81.7      |               |          |           |
| Glc2:O2       | Arg471   | 141.3     |               |          |           |
| Glc2:O3       | Arg471   | 99.5      |               |          |           |
| Glc2:O6       | Asn412   | 26.7      |               |          |           |
| Glc1:O3       | Trp417   | 57.4      |               |          |           |
| Glc1:O6       | Asn298   | 50.0      |               |          |           |
