# Supplementary material for: Differences in protein structural regions that impact functional specificity in GT2 family β-glucan synthases
Source: PubMed Central journal article supplement (PMC6821405; doi:10.1371/journal.pone.0224442), 2019-10-30
Supplement: pone.0224442.s014.pdf [file pone.0224442.s014.pdf]

**S14 Table. Heavy atom RMSD data (Å) for protein and  $\beta$ -glucan residues calculated over the last 50 ns of simulations.**

|                  | AtumCrdS<br>Conf-F |        | AtumCrdS<br>Conf-B |        | RsBcsA<br>Conf-F |        | RsBcsA<br>Conf-B |        |
|------------------|--------------------|--------|--------------------|--------|------------------|--------|------------------|--------|
|                  | Avg                | St Dev | Avg                | St Dev | Avg              | St Dev | Avg              | St Dev |
| Cytosolic        | 2.98               | 0.31   | 2.32               | 0.15   | 1.25             | 0.10   | 1.45             | 0.13   |
| Protein Backbone | 3.40               | 0.21   | 3.06               | 0.21   | 2.07             | 0.18   | 1.93             | 0.09   |
| Gating Loop      | 3.58               | 0.54   | 4.36               | 0.53   | 2.31             | 0.46   | 3.77             | 0.60   |
| TM Channel       | 2.02               | 0.14   | 2.30               | 0.10   | 2.32             | 0.36   | 1.70             | 0.16   |
| TM domain        | 3.21               | 0.14   | 2.74               | 0.11   | 2.64             | 0.25   | 2.09             | 0.10   |
| $\beta$ -Glucan  | 1.08               | 0.14   | 1.16               | 0.25   | 1.14             | 0.23   | 0.83             | 0.12   |

See MD simulation 'Analysis of Methods' section for residue ranges of the different domains.
