# Supplementary material for: Differences in protein structural regions that impact functional specificity in GT2 family β-glucan synthases
Source: PubMed Central journal article supplement (PMC6821405; doi:10.1371/journal.pone.0224442), 2019-10-30
Supplement: pone.0224442.s015.pdf [file pone.0224442.s015.pdf]

**S15 Table. Amino acid residues identified in mutational studies of genes encoding plant CesA and CslF6 proteins that do not lie within regions of differential conservation common to bacterial BcsA, CrdS and BgsA proteins.**

| Mutant                                                                                                                                                                  | Phenotype                                                       | CesA             | CslF            | BcsA              | CrdS    | BgsA    | Reference                                                  |
|-------------------------------------------------------------------------------------------------------------------------------------------------------------------------|-----------------------------------------------------------------|------------------|-----------------|-------------------|---------|---------|------------------------------------------------------------|
| <i>Atcesa3</i> <sup>S301F</sup><br>( <i>eli1-1</i> )                                                                                                                    | Ectopic lignin                                                  | Ser              | Ser/Thr         | Ser/Gly<br>(114)* | Ser     | Phe/Leu | (Caño-Delgado et al. 2000)                                 |
| <i>Atcesa3</i> <sup>S377F</sup><br>( <i>ixr1-6</i> )                                                                                                                    | Reduced growth and lower crystallinity                          | Ser              | Ser             | Leu<br>(178)      | Leu/Cys | Leu     | (Sethaphong et al. 2013)                                   |
| <i>Atcesa3</i> <sup>A522V</sup><br>( <i>eli1-2</i> ) /<br><i>Atcesa1</i> <sup>A549V</sup><br>( <i>rsw1-1</i> )                                                          | Dwarf phenotype, misshapen xylem cells, ectopic lignin          | Ala              | Ala             | -<br>(237)        | N/C     | -       | (Arioli et al. 1998; Caño-Delgado et al. 2000)             |
| <i>Atcesa7</i> <sup>D524N</sup><br>( <i>irx3-5</i> )                                                                                                                    | Collapsed xylem                                                 | Asp              | Asp             | Asp<br>(246)      | Asp     | Asp     | (Liang et al. 2010)                                        |
| <i>Atcesa7</i> <sup>P557T</sup><br>( <i>fra5</i> ) /<br><i>Atcesa3</i> <sup>P578S</sup><br>( <i>thanatos</i> ) /<br><i>Atcesa3</i> <sup>P578S</sup><br>( <i>repp3</i> ) | Reduced wall thickness and cellulose content                    | Pro              | Pro             | Pro<br>(275)      | Pro     | Pro     | (Zhong et al. 2003; Daras et al. 2009; Feraru et al. 2011) |
| <i>Atcesa1</i> <sup>G631S</sup><br>( <i>rsw1-2</i> )                                                                                                                    | Swollen embryos and reduced cellulose                           | Gly              | Gly             | Gly<br>(319)      | Gly     | Gly     | (Gillmor et al. 2002)                                      |
| <i>Atcesa8</i> <sup>D683N</sup><br>( <i>irx1-1</i> ) /<br><i>Atcesa1</i> <sup>D780N</sup><br>( <i>rsw1-20</i> )                                                         | Radially swollen, collapsed xylem                               | Asp              | Asp             | Asp<br>(343)      | Asp     | Asp     | (Taylor et al. 2000; Beekman et al. 2002)                  |
| <i>Atcesa1</i> <sup>E779K</sup><br>( <i>rsw1-45</i> )                                                                                                                   | Irregular shaped and swollen cells                              | Glu              | Glu             | Glu<br>(342)      | Glu     | Glu     | (Beekman et al. 2002)                                      |
| <i>Atcesa8</i> <sup>L791F</sup><br>( <i>lew2-2</i> )                                                                                                                    | Dwarf phenotype, collapsed xylem                                | Ile/Leu          | Pro             | NC<br>(445)       | NC      | NC      | (Chen et al. 2005)                                         |
| <i>Atcesa1</i> <sup>A903V</sup><br>( <i>ags1-2</i> )                                                                                                                    | Quinoxypen resistance, modified cellulose microfibril structure | Ala#/<br>Phe/Ile | His/Leu<br>/Glu | NC<br>(461)       | NC      | NC      | (Harris et al. 2012)                                       |
| <i>Atcesa3</i> <sup>T942I</sup><br>( <i>ixr1-2</i> )                                                                                                                    | Isoxaben resistance                                             | Thr              | Thr             | Thr<br>(506)      | Thr     | Thr     | (Scheible et al. 2001)                                     |
| <i>Atcesa3</i> <sup>G998D</sup><br>( <i>ixr1-1</i> )                                                                                                                    | Isoxaben resistance                                             | Gly              | Leu/Gly         | NC<br>(551)       | NC      | Phe     | (Scheible et al. 2001)                                     |

\* Number in brackets indicates the residue number in RsBcsA equivalent to plant CesA mutation.

# Invariant only in primary CesAs (AtCesA1, 2, 3, 5, 6, 9).

Gaps indicated by “-”.

NC, not conserved.
