# Supplementary material for: Differences in protein structural regions that impact functional specificity in GT2 family β-glucan synthases
Source: PubMed Central journal article supplement (PMC6821405; doi:10.1371/journal.pone.0224442), 2019-10-30
Supplement: pone.0224442.s016.pdf [file pone.0224442.s016.pdf]

**S16 Table.  $\beta$ -Glucan RMSF data ( $\text{\AA}$ ) of individual Glc residues within the  $\beta$ -glucan chain modelled in either AtumCrdS or RsBcsA.**

| Glucose  | AtumCrdS<br>Conf-F | AtumCrdS<br>Conf-B | RsBcsA<br>Conf-F | RsBcsA<br>Conf-B |
|----------|--------------------|--------------------|------------------|------------------|
| 9        | 0.62               | 0.82               | 1.34             | 1.49             |
| 8        | 0.50               | 0.63               | 0.69             | 0.78             |
| 7        | 0.50               | 0.58               | 0.60             | 0.57             |
| 6        | 0.53               | 0.62               | 0.58             | 0.50             |
| 5        | 0.50               | 0.63               | 0.47             | 0.51             |
| 4        | 0.47               | 0.59               | 0.45             | 0.45             |
| 3        | 0.47               | 0.55               | 0.52             | 0.55             |
| 2        | 0.57               | 0.64               | 0.51             | 0.65             |
| 1        | 0.67               | 0.78               | 0.55             | 0.67             |
| Acceptor | 0.69               | 0.68               | 0.60             | 0.59             |

Glc numbered from the acceptor Glc onwards. (1,3)- $\beta$ -glucan in AtumCrdS and (1,4)- $\beta$ -glucan in RsBcsA calculated over the last 50 ns of simulations.
