# Supplementary material for: Differences in protein structural regions that impact functional specificity in GT2 family β-glucan synthases
Source: PubMed Central journal article supplement (PMC6821405; doi:10.1371/journal.pone.0224442), 2019-10-30
Supplement: pone.0224442.s021.pdf [file pone.0224442.s021.pdf]

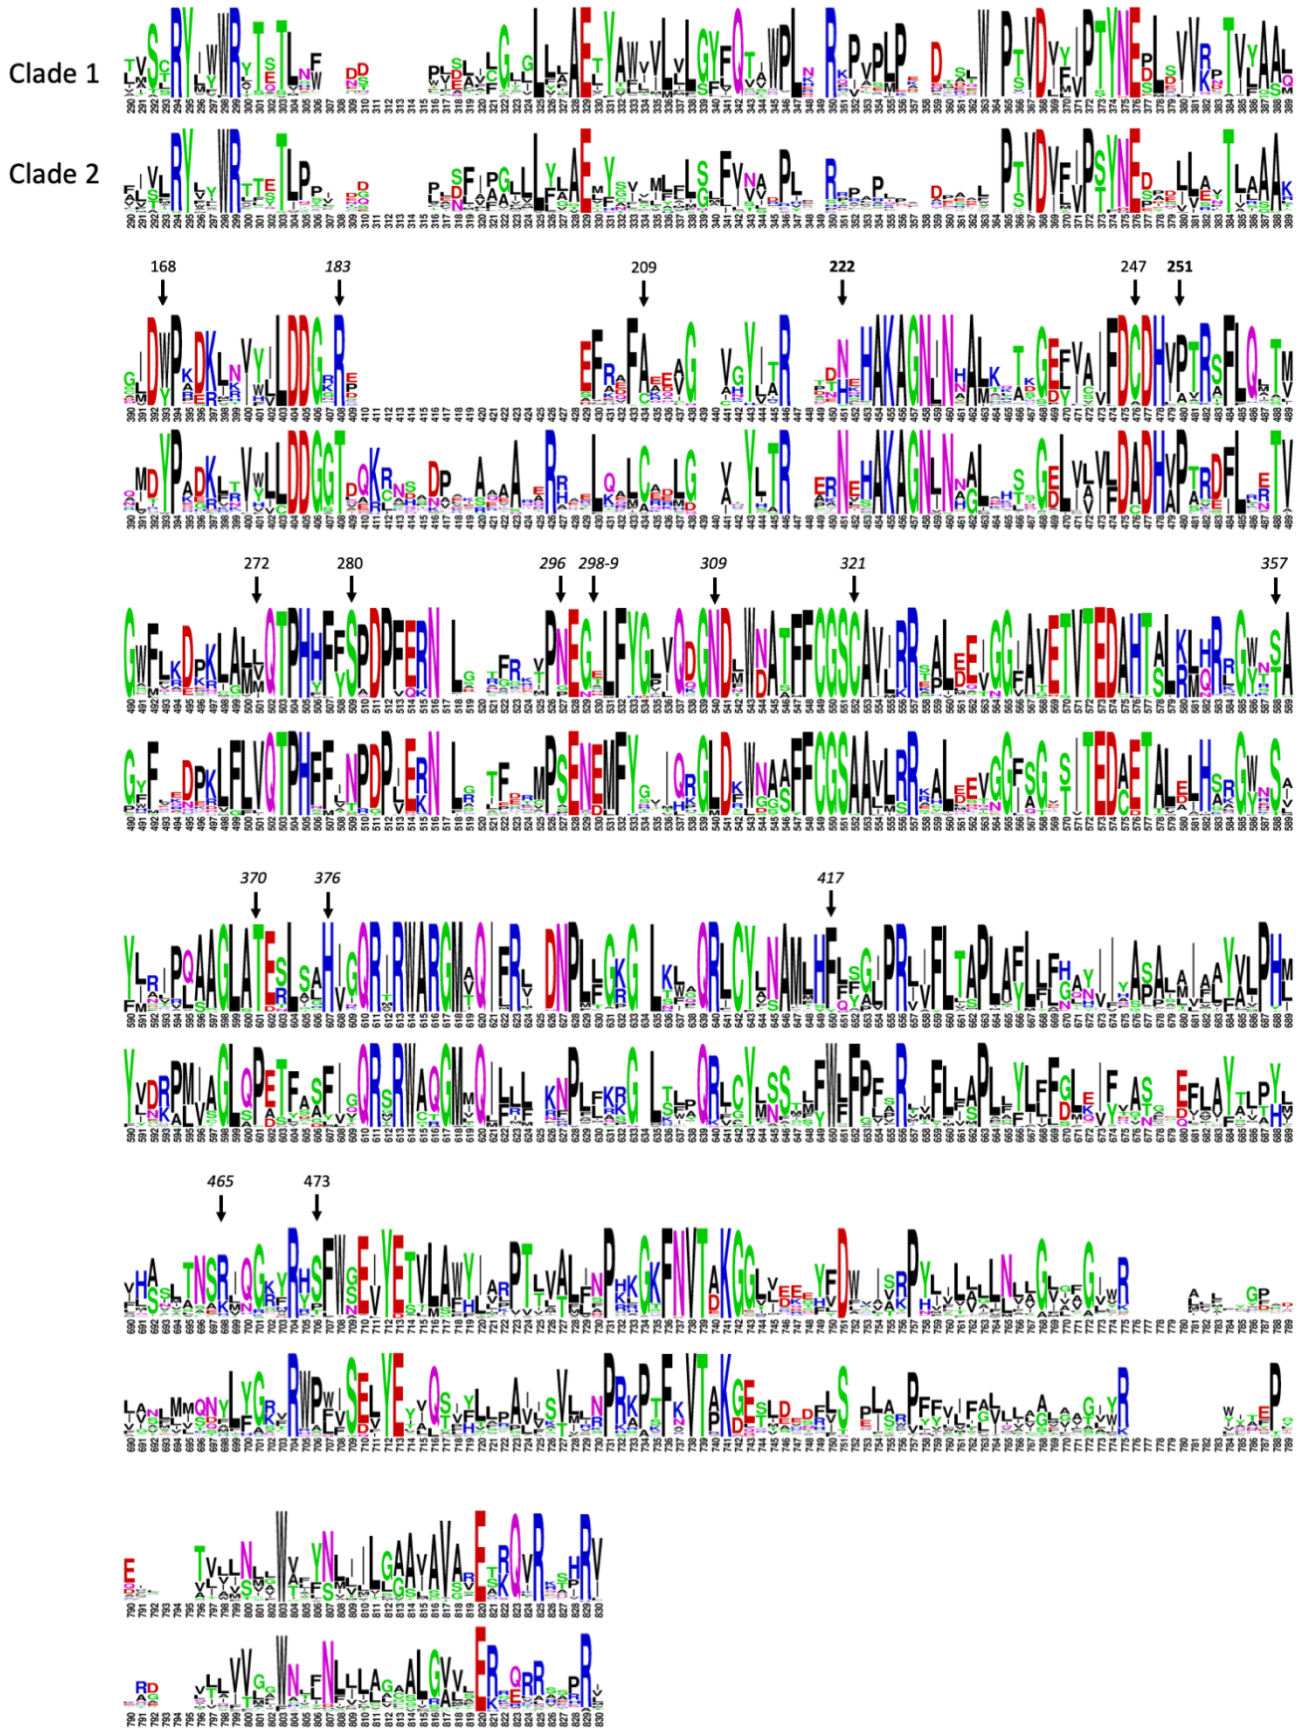

**S5 Fig. Sequence logos for bacterial cellulose synthase clades 1 and 2.** Sequence logos that highlight the frequency with which amino acids are found at particular positions are shown for clade 1 and clade 2 from the refined sub-set of sequences (**Fig. 2**). The font size of an amino acid represents the frequency with which that amino acid is found at that position, with the greater the size the greater the conservation. Amino acids are coloured by residue type: red, acidic; blue, basic; green, polar; neutral, purple; black, hydrophobic. Gaps were inserted into each sequence logo, based on the multiple sequence alignment of all proteins such that when stacked with the other logos, key conserved residues would align. Residues in Clade 1 with different conservation to Clade 2 are highlighted.
