# Supplementary material for: Differences in protein structural regions that impact functional specificity in GT2 family β-glucan synthases
Source: PubMed Central journal article supplement (PMC6821405; doi:10.1371/journal.pone.0224442), 2019-10-30
Supplement: pone.0224442.s025.pdf [file pone.0224442.s025.pdf]

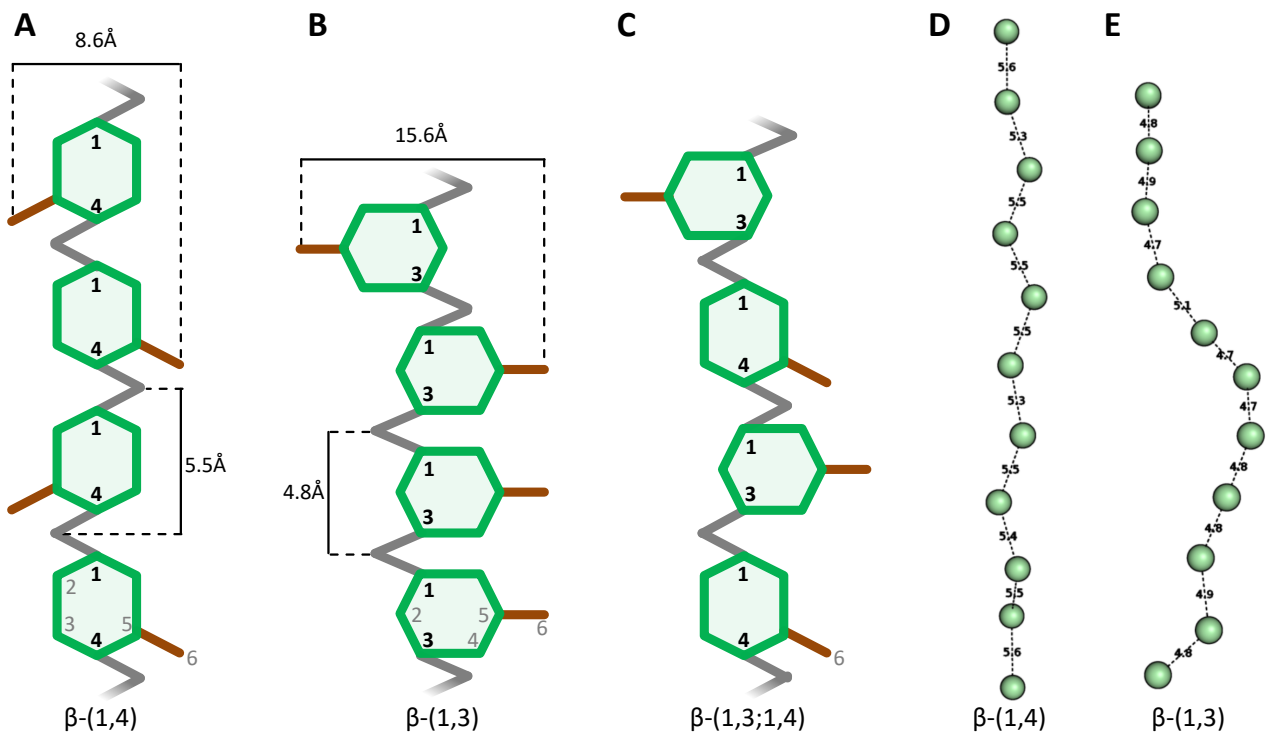

**S9 Fig. Schematic of the backbone structure and lengths of the  $\beta$ -glucans.** Glc residues (green) are represented as hexagons for: **(A)** (1,4)- $\beta$ -glucan, cellulose; **(B)** (1,3)- $\beta$ -glucan, curdlan; **(C)** (1,3;1,4)- $\beta$ -glucan, MLG. Glycosidic linkages coloured grey and exocyclic groups (C6) in brown. Carbons are numbered in the first Glc, with only C1 (anomeric) and C4 (**A & C**)/C3 (**B & C**) (glycosidic linkage carbon) labelled thereafter. It should be noted that the Glc residues are stacked “vertically” (Glc residues tip-to-tip) in the (1,4)- $\beta$ -glucan whereas they are stacked “horizontally” (Glc residues on their sides) in the (1,3)- $\beta$ -glucan. This gives a longer inter-glycosidic bond distances in the (1,4)- $\beta$ -glucan and allows for fewer Glc residues to fit in the TM channel. MLG has somewhat intermediate length properties due to its mixture of (1,3)- $\beta$ - and (1,4)- $\beta$ - linkages. Observed inter-glycosidic bond distances for each Glc pair for **(D)** the (1,4)- $\beta$ -glucan in the BcsA crystal structure and **(E)** the (1,3)- $\beta$ -glucan in the CrdS model.
